# Supplementary material for: Assessment of the Impact of Lower Urinary Tract Dysfunction on Quality of Life in Multiple Sclerosis Patients in Saudi Arabia—A Cross-Sectional Study
Source: MDPI journal article supplement (doi:10.3390/healthcare11192694), 2023-10-09
Supplement: s1 [file s1]

**Table S1.** The LURN questionnaire scores for the participants.

| Questionnaire                                                                                      |                                                                                                                                                | Frequency             | patient |        | Gender  |        |        |          | P – value* |
|----------------------------------------------------------------------------------------------------|------------------------------------------------------------------------------------------------------------------------------------------------|-----------------------|---------|--------|---------|--------|--------|----------|------------|
|                                                                                                    |                                                                                                                                                |                       |         |        | Females |        | Males  |          |            |
|                                                                                                    |                                                                                                                                                |                       | Count   | %      | Count   | %      | Count  | %        |            |
| Incontinence                                                                                       | 1. In the past 7 days, how often did you completely lose control of your bladder?                                                              | never                 | 183     | 42.80% | 122     | 45.20% | 61     | 38.60%   | 0.325      |
|                                                                                                    |                                                                                                                                                | a few times           | 133     | 31.10% | 85      | 31.50% | 48     | 30.40%   |            |
|                                                                                                    |                                                                                                                                                | about half the times  | 34      | 7.90%  | 18      | 6.70%  | 16     | 10.10%   |            |
|                                                                                                    |                                                                                                                                                | most of the time      | 49      | 11.40% | 26      | 9.60%  | 23     | 14.60%   |            |
|                                                                                                    |                                                                                                                                                | every time            | 29      | 6.80%  | 19      | 7.00%  | 10     | 6.30%    |            |
|                                                                                                    | 2. In the past 7 days, how often did you leak urine or wet a pad after feeling a sudden need to urinate?                                       | never                 | 228     | 53.30% | 149     | 55.20% | 79     | 50.00%   | 0.2        |
|                                                                                                    |                                                                                                                                                | a few times           | 128     | 29.90% | 82      | 30.40% | 46     | 29.10%   |            |
|                                                                                                    |                                                                                                                                                | about half the times  | 28      | 6.50%  | 13      | 4.80%  | 15     | 9.50%    |            |
|                                                                                                    |                                                                                                                                                | most of the time      | 32      | 7.50%  | 17      | 6.30%  | 15     | 9.50%    |            |
|                                                                                                    |                                                                                                                                                | every time            | 12      | 2.80%  | 9       | 3.30%  | 3      | 1.90%    |            |
|                                                                                                    | 3. In the past 7 days, how often did you leak urine or wet a pad while laughing, sneezing, or coughing?                                        | never                 | 279     | 65.20% | 174     | 64.40% | 105    | 66.50%   | 0.434      |
|                                                                                                    |                                                                                                                                                | a few times           | 104     | 24.30% | 67      | 24.80% | 37     | 23.40%   |            |
|                                                                                                    |                                                                                                                                                | about half the times  | 20      | 4.70%  | 10      | 3.70%  | 10     | 6.30%    |            |
|                                                                                                    |                                                                                                                                                | most of the time      | 18      | 4.20%  | 13      | 4.80%  | 5      | 3.20%    |            |
|                                                                                                    |                                                                                                                                                | every time            | 7       | 1.60%  | 6       | 2.20%  | 1      | 0.60%    |            |
|                                                                                                    | 4. In the past 7 days, how often did you leak urine or wet a pad when doing physical activities, such as exercising or lifting a heavy object? | never                 | 292     | 68.20% | 188     | 69.60% | 104    | 65.80%   | 0.534      |
|                                                                                                    |                                                                                                                                                | a few times           | 99      | 23.10% | 62      | 23.00% | 37     | 23.40%   |            |
|                                                                                                    |                                                                                                                                                | about half the times  | 19      | 4.40%  | 11      | 4.10%  | 8      | 5.10%    |            |
|                                                                                                    |                                                                                                                                                | most of the time      | 14      | 3.30%  | 6       | 2.20%  | 8      | 5.10%    |            |
|                                                                                                    |                                                                                                                                                | every time            | 4       | 0.90%  | 3       | 1.10%  | 1      | 0.60%    |            |
|                                                                                                    | 5. In the past 7 days, how often did walking at your usual speed cause you to leak urine or wet a pad?                                         | never                 | 292     | 68.20% | 187     | 69.30% | 105    | 66.50%   | 0.54       |
|                                                                                                    |                                                                                                                                                | a few times           | 95      | 22.20% | 56      | 20.70% | 39     | 24.70%   |            |
|                                                                                                    |                                                                                                                                                | about half the times  | 20      | 4.70%  | 11      | 4.10%  | 9      | 5.70%    |            |
|                                                                                                    |                                                                                                                                                | most of the time      | 15      | 3.50%  | 11      | 4.10%  | 4      | 2.50%    |            |
|                                                                                                    |                                                                                                                                                | every time            | 6       | 1.40%  | 5       | 1.90%  | 1      | 0.60%    |            |
|                                                                                                    | 6. In the past 7 days, how often did you leak urine during the night, including wetting a pad or the bed?                                      | never                 | 337     | 78.70% | 220     | 81.50% | 117    | 74.10%   | 0.15       |
|                                                                                                    |                                                                                                                                                | a few nights          | 61      | 14.30% | 37      | 13.70% | 24     | 15.20%   |            |
|                                                                                                    |                                                                                                                                                | about half the nights | 12      | 2.80%  | 4       | 1.50%  | 8      | 5.10%    |            |
|                                                                                                    |                                                                                                                                                | most nights           | 14      | 3.30%  | 7       | 2.60%  | 7      | 4.40%    |            |
|                                                                                                    |                                                                                                                                                | every night           | 4       | 0.90%  | 2       | 0.70%  | 2      | 1.30%    |            |
|                                                                                                    | 7. In the past 7 days, how often did you have pain or discomfort in your bladder while it was filling?                                         | never                 | 150     | 35.00% | 103     | 38.10% | 47     | 29.70%   | 0.354      |
|                                                                                                    |                                                                                                                                                | a few times           | 150     | 35.00% | 91      | 33.70% | 59     | 37.30%   |            |
|                                                                                                    |                                                                                                                                                | about half the times  | 38      | 8.90%  | 23      | 8.50%  | 15     | 9.50%    |            |
|                                                                                                    |                                                                                                                                                | most of the time      | 65      | 15.20% | 36      | 13.30% | 29     | 18.40%   |            |
|                                                                                                    |                                                                                                                                                | every time            | 25      | 5.80%  | 17      | 6.30%  | 8      | 5.10%    |            |
| 8. In the past 7 days, how often did you have pain or discomfort in your bladder when it was full? | never                                                                                                                                          | 132                   | 30.80%  | 87     | 32.20%  | 45     | 28.50% | 0.316    |            |
|                                                                                                    | a few times                                                                                                                                    | 156                   | 36.40%  | 103    | 38.10%  | 53     | 33.50% |          |            |
|                                                                                                    | about half the times                                                                                                                           | 52                    | 12.10%  | 28     | 10.40%  | 24     | 15.20% |          |            |
|                                                                                                    | most of the time                                                                                                                               | 63                    | 14.70%  | 35     | 13.00%  | 28     | 17.70% |          |            |
|                                                                                                    | every time                                                                                                                                     | 25                    | 5.80%   | 17     | 6.30%   | 8      | 5.10%  |          |            |
| 9. In the past 7 days, how often did you have pain or discomfort while urinating?                  | never                                                                                                                                          | 204                   | 47.70%  | 143    | 53.00%  | 61     | 38.60% | 0.000326 |            |
|                                                                                                    | a few times                                                                                                                                    | 132                   | 30.80%  | 87     | 32.20%  | 45     | 28.50% |          |            |
|                                                                                                    | about half the times                                                                                                                           | 38                    | 8.90%   | 15     | 5.60%   | 23     | 14.60% |          |            |

|                                                                                                                     |                                                                                                           |                      |        |        |        |        |        |          |          |
|---------------------------------------------------------------------------------------------------------------------|-----------------------------------------------------------------------------------------------------------|----------------------|--------|--------|--------|--------|--------|----------|----------|
| Voiding difficulty                                                                                                  | 10. In the past 7 days, how often did you have pain or discomfort right after you had finished urinating? | most of the time     | 34     | 7.90%  | 17     | 6.30%  | 17     | 10.80%   | 0.033    |
|                                                                                                                     |                                                                                                           | every time           | 20     | 4.70%  | 8      | 3.00%  | 12     | 7.60%    |          |
|                                                                                                                     |                                                                                                           | never                | 250    | 58.40% | 171    | 63.30% | 79     | 50.00%   |          |
|                                                                                                                     |                                                                                                           | a few times          | 97     | 22.70% | 59     | 21.90% | 38     | 24.10%   |          |
|                                                                                                                     |                                                                                                           | about half the times | 32     | 7.50%  | 14     | 5.20%  | 18     | 11.40%   |          |
|                                                                                                                     | 11. In the past 7 days, how often did you have to push when urinating?                                    | most of the time     | 34     | 7.90%  | 18     | 6.70%  | 16     | 10.10%   | 0.17     |
|                                                                                                                     |                                                                                                           | every time           | 15     | 3.50%  | 8      | 3.00%  | 7      | 4.40%    |          |
|                                                                                                                     |                                                                                                           | never                | 169    | 39.50% | 118    | 43.70% | 51     | 32.30%   |          |
|                                                                                                                     |                                                                                                           | a few times          | 144    | 33.60% | 87     | 32.20% | 57     | 36.10%   |          |
|                                                                                                                     |                                                                                                           | about half the times | 47     | 11.00% | 28     | 10.40% | 19     | 12.00%   |          |
|                                                                                                                     | 12. In the past 7 days, how often did you have a delay before you started to urinate?                     | most of the time     | 48     | 11.20% | 27     | 10.00% | 21     | 13.30%   | 0.00004  |
|                                                                                                                     |                                                                                                           | every time           | 20     | 4.70%  | 10     | 3.70%  | 10     | 6.30%    |          |
|                                                                                                                     |                                                                                                           | never                | 175    | 40.90% | 133    | 49.30% | 42     | 26.60%   |          |
|                                                                                                                     |                                                                                                           | a few times          | 141    | 32.90% | 84     | 31.10% | 57     | 36.10%   |          |
|                                                                                                                     |                                                                                                           | about half the times | 40     | 9.30%  | 20     | 7.40%  | 20     | 12.70%   |          |
|                                                                                                                     | 13. In the past 7 days, once you started urinating, how often did your urine flow stop and start again?   | most of the time     | 49     | 11.40% | 23     | 8.50%  | 26     | 16.50%   | 0.000301 |
|                                                                                                                     |                                                                                                           | every time           | 23     | 5.40%  | 10     | 3.70%  | 13     | 8.20%    |          |
|                                                                                                                     |                                                                                                           | never                | 183    | 42.80% | 128    | 47.40% | 55     | 34.80%   |          |
|                                                                                                                     |                                                                                                           | a few times          | 134    | 31.30% | 84     | 31.10% | 50     | 31.60%   |          |
|                                                                                                                     |                                                                                                           | about half the times | 45     | 10.50% | 32     | 11.90% | 13     | 8.20%    |          |
|                                                                                                                     | 14. In the past 7 days, how often was your urine flow slow or weak?                                       | most of the time     | 43     | 10.00% | 16     | 5.90%  | 27     | 17.10%   | 0.003    |
|                                                                                                                     |                                                                                                           | every time           | 23     | 5.40%  | 10     | 3.70%  | 13     | 8.20%    |          |
|                                                                                                                     |                                                                                                           | never                | 165    | 38.60% | 115    | 42.60% | 50     | 31.60%   |          |
|                                                                                                                     |                                                                                                           | a few times          | 147    | 34.30% | 99     | 36.70% | 48     | 30.40%   |          |
|                                                                                                                     |                                                                                                           | about half the times | 50     | 11.70% | 26     | 9.60%  | 24     | 15.20%   |          |
| 15. In the past 7 days, how often did you have a trickle or dribble at the end of your urine flow?                  | most of the time                                                                                          | 39                   | 9.10%  | 19     | 7.00%  | 20     | 12.70% | 0.000096 |          |
|                                                                                                                     | every time                                                                                                | 27                   | 6.30%  | 11     | 4.10%  | 16     | 10.10% |          |          |
|                                                                                                                     | never                                                                                                     | 143                  | 33.40% | 106    | 39.30% | 37     | 23.40% |          |          |
|                                                                                                                     | a few times                                                                                               | 131                  | 30.60% | 85     | 31.50% | 46     | 29.10% |          |          |
|                                                                                                                     | about half the times                                                                                      | 48                   | 11.20% | 30     | 11.10% | 18     | 11.40% |          |          |
| 16. In the past 7 days, how often did you feel a sudden need to urinate?                                            | most of the time                                                                                          | 59                   | 13.80% | 23     | 8.50%  | 36     | 22.80% | 0.003    |          |
|                                                                                                                     | every time                                                                                                | 47                   | 11.00% | 26     | 9.60%  | 21     | 13.30% |          |          |
|                                                                                                                     | never                                                                                                     | 124                  | 29.00% | 90     | 33.30% | 34     | 21.50% |          |          |
|                                                                                                                     | a few times                                                                                               | 93                   | 21.70% | 66     | 24.40% | 27     | 17.10% |          |          |
|                                                                                                                     | about half the times                                                                                      | 105                  | 24.50% | 53     | 19.60% | 52     | 32.90% |          |          |
| 17. In the past 7 days, how often did you have a sudden need to rush to urinate for fear of leaking urine?          | most of the time                                                                                          | 72                   | 16.80% | 40     | 14.80% | 32     | 20.30% | 0.193    |          |
|                                                                                                                     | every time                                                                                                | 34                   | 7.90%  | 21     | 7.80%  | 13     | 8.20%  |          |          |
|                                                                                                                     | never                                                                                                     | 160                  | 37.40% | 107    | 39.60% | 53     | 33.50% |          |          |
|                                                                                                                     | a few times                                                                                               | 71                   | 16.60% | 48     | 17.80% | 23     | 14.60% |          |          |
|                                                                                                                     | about half the times                                                                                      | 101                  | 23.60% | 58     | 21.50% | 43     | 27.20% |          |          |
| 18. In the past 7 days, once you noticed the need to urinate, how difficult was it to wait more than a few minutes? | most of the time                                                                                          | 72                   | 16.80% | 46     | 17.00% | 26     | 16.50% | 0.131    |          |
|                                                                                                                     | every time                                                                                                | 24                   | 5.60%  | 11     | 4.10%  | 13     | 8.20%  |          |          |
|                                                                                                                     | Not difficult                                                                                             | 139                  | 32.50% | 99     | 36.70% | 40     | 25.30% |          |          |
|                                                                                                                     | A little difficult                                                                                        | 84                   | 19.60% | 51     | 18.90% | 33     | 20.90% |          |          |
|                                                                                                                     | somewhat difficult                                                                                        | 138                  | 32.20% | 83     | 30.70% | 55     | 34.80% |          |          |
| Nocturia                                                                                                            |                                                                                                           | very difficult       | 50     | 11.70% | 29     | 10.70% | 21     | 13.30%   | 0.47     |
|                                                                                                                     |                                                                                                           | unable to wait       | 17     | 4.00%  | 8      | 3.00%  | 9      | 5.70%    |          |
|                                                                                                                     |                                                                                                           | None                 | 104    | 24.30% | 69     | 25.60% | 35     | 22.20%   |          |
|                                                                                                                     |                                                                                                           | 1 time               | 137    | 32.00% | 85     | 31.50% | 52     | 32.90%   |          |

|                     |                                                                                                                                |                        |     |        |     |        |    |        |          |
|---------------------|--------------------------------------------------------------------------------------------------------------------------------|------------------------|-----|--------|-----|--------|----|--------|----------|
| Post<br>micturition | 19. In the past 7 days, during a typical night, how many times did you wake up and urinate?                                    | 2 - 3 times            | 127 | 29.70% | 83  | 30.70% | 44 | 27.80% | 0.159    |
|                     |                                                                                                                                | more than 3 times      | 60  | 14.00% | 33  | 12.20% | 27 | 17.10% |          |
|                     | 20. In the past 7 days, how often did you wake up at least once during the night because you had to urinate?                   | never                  | 110 | 25.70% | 69  | 25.60% | 41 | 25.90% |          |
|                     |                                                                                                                                | a few nights           | 138 | 32.20% | 97  | 35.90% | 41 | 25.90% |          |
|                     |                                                                                                                                | about half the nights  | 123 | 28.70% | 74  | 27.40% | 49 | 31.00% |          |
|                     |                                                                                                                                | most nights            | 34  | 7.90%  | 19  | 7.00%  | 15 | 9.50%  | 0.212    |
|                     |                                                                                                                                | every night            | 23  | 5.40%  | 11  | 4.10%  | 12 | 7.60%  |          |
|                     | 21. In the past 7 days, during waking hours, how many times did you typically urinate?                                         | 3 or fewer times a day | 157 | 36.70% | 104 | 38.50% | 53 | 33.50% |          |
|                     |                                                                                                                                | 4-7 times a day        | 189 | 44.20% | 109 | 40.40% | 80 | 50.60% |          |
|                     |                                                                                                                                | 8-10 times a day       | 59  | 13.80% | 41  | 15.20% | 18 | 11.40% |          |
|                     |                                                                                                                                | 11 or more times a day | 23  | 5.40%  | 16  | 5.90%  | 7  | 4.40%  | 0.176    |
|                     | 22. In the past 7 days, during a typical day, how much time typically passed between urinations?                               | More than 6 hours      | 66  | 15.40% | 33  | 12.20% | 33 | 20.90% |          |
|                     |                                                                                                                                | 5-6 hours              | 79  | 18.40% | 58  | 21.10% | 21 | 13.30% |          |
|                     |                                                                                                                                | 3-4 hours              | 247 | 57.60% | 157 | 58.10% | 90 | 57.00% |          |
|                     |                                                                                                                                | 1-2 hours              | 0   | 0.00%  | 0   | 0.00%  | 0  | 0.00%  |          |
|                     |                                                                                                                                | Less than 1 hour       | 37  | 8.60%  | 23  | 8.50%  | 14 | 8.90%  | 0.452    |
|                     | 23. In the past 7 days, how would you describe your typical urge to urinate when you woke up during the night?                 | No urge                | 128 | 29.90% | 77  | 28.50% | 51 | 32.30% |          |
|                     |                                                                                                                                | Mild urg               | 109 | 25.50% | 64  | 23.70% | 44 | 27.80% |          |
|                     |                                                                                                                                | Moderate urge          | 115 | 26.90% | 76  | 28.10% | 40 | 25.30% |          |
|                     |                                                                                                                                | Strong urge            | 76  | 17.80% | 53  | 19.60% | 23 | 14.60% |          |
|                     | 24. In the past 7 days, did you have a constant need to urinate that did not go away?                                          | Yes                    | 244 | 56.60% | 160 | 59.30% | 84 | 53.20% | 0.008    |
|                     |                                                                                                                                | No                     | 184 | 43.40% | 110 | 40.70% | 74 | 46.80% |          |
|                     | 25. In the past 7 days, how often did you feel that your bladder was not completely empty after urination?                     | never                  | 120 | 28.00% | 64  | 23.70% | 57 | 36.10% |          |
|                     |                                                                                                                                | a few times            | 182 | 42.50% | 116 | 43.00% | 66 | 41.80% |          |
|                     |                                                                                                                                | about half the times   | 39  | 9.30%  | 23  | 8.50%  | 16 | 10.10% | 2.04E-07 |
|                     |                                                                                                                                | most of the time       | 58  | 13.70% | 43  | 15.90% | 15 | 9.50%  |          |
|                     |                                                                                                                                | every time             | 28  | 6.50%  | 24  | 8.90%  | 4  | 2.50%  |          |
|                     | 26. In the past 7 days, how often did you dribble urine just after zipping your pants or pulling up your underwear?            | never                  | 238 | 55.60% | 148 | 54.80% | 90 | 57.00% |          |
|                     |                                                                                                                                | a few times            | 123 | 28.70% | 74  | 27.40% | 49 | 31.00% |          |
| Urinary<br>symptoms |                                                                                                                                | about half the times   | 28  | 6.50%  | 15  | 5.60%  | 13 | 8.20%  | 0.946    |
|                     |                                                                                                                                | most of the time       | 26  | 6.10%  | 24  | 8.90%  | 2  | 1.30%  |          |
|                     |                                                                                                                                | every time             | 13  | 3.00%  | 9   | 3.30%  | 4  | 2.50%  |          |
|                     | 27. In the past 7 days, how often did you have spraying or change in direction (men) / splitting (women) of your urine stream? | never                  | 200 | 46.70% | 130 | 48.10% | 70 | 44.30% |          |
|                     |                                                                                                                                | a few times            | 132 | 30.80% | 82  | 30.40% | 50 | 31.60% | 0.041    |
|                     |                                                                                                                                | about half the times   | 37  | 8.60%  | 23  | 8.50%  | 14 | 8.90%  |          |
|                     |                                                                                                                                | most of the time       | 37  | 8.60%  | 22  | 8.10%  | 15 | 9.50%  |          |
|                     |                                                                                                                                | every time             | 22  | 5.10%  | 13  | 4.80%  | 9  | 5.70%  |          |
|                     | 28. In the past 7 days, how bothered were you by urinary symptoms?                                                             | Not at all bothered    | 123 | 28.70% | 76  | 28.10% | 47 | 29.70% |          |
|                     |                                                                                                                                | Somewhat bothered      | 183 | 42.80% | 106 | 39.30% | 77 | 48.70% |          |
|                     |                                                                                                                                | Very bothered          | 59  | 13.80% | 39  | 14.40% | 20 | 12.70% |          |
|                     |                                                                                                                                | Extremely bothered     | 63  | 14.70% | 49  | 18.10% | 14 | 8.90%  |          |

**Table S2.** The WHOQOL-BREF questionnaire scores for the participants.

| Questionnaire                                                                                | Frequency                          | patient |       | Gender  |       |       |       | P - value* |
|----------------------------------------------------------------------------------------------|------------------------------------|---------|-------|---------|-------|-------|-------|------------|
|                                                                                              |                                    |         |       | Females |       | Males |       |            |
|                                                                                              |                                    | Count   | %     | Count   | %     | Count | %     |            |
| 1. How would you rate your quality of life?                                                  | Very poor                          | 15      | 3.5%  | 9       | 3.3%  | 6     | 3.8%  | 0.043      |
|                                                                                              | Poor                               | 38      | 8.9%  | 23      | 8.5%  | 15    | 9.5%  |            |
|                                                                                              | Neither poor nor good              | 186     | 43.5% | 104     | 38.5% | 82    | 51.9% |            |
|                                                                                              | Good                               | 132     | 30.8% | 96      | 35.6% | 36    | 22.8% |            |
|                                                                                              | Very good                          | 57      | 13.3% | 38      | 14.1% | 19    | 12.0% |            |
| 2. How satisfied are you with your health?                                                   | Very dissatisfied                  | 25      | 5.8%  | 16      | 5.9%  | 9     | 5.7%  | 0.537      |
|                                                                                              | Dissatisfied                       | 38      | 8.9%  | 19      | 7.0%  | 19    | 12.0% |            |
|                                                                                              | Neither satisfied nor dissatisfied | 136     | 31.8% | 87      | 32.2% | 49    | 31.0% |            |
|                                                                                              | Satisfied                          | 162     | 37.9% | 104     | 38.5% | 58    | 36.7% |            |
|                                                                                              | Very satisfied                     | 67      | 15.7% | 44      | 16.3% | 23    | 14.6% |            |
| 3.To what extent do you feel that physical pain prevents you from doing what you need to do? | Not at all                         | 37      | 8.6%  | 27      | 10.0% | 10    | 6.3%  | 0.612      |
|                                                                                              | A little                           | 73      | 17.1% | 45      | 16.7% | 28    | 17.7% |            |
|                                                                                              | A moderate amount                  | 193     | 45.1% | 123     | 45.6% | 70    | 44.3% |            |
|                                                                                              | Very much                          | 19      | 4.4%  | 10      | 3.7%  | 9     | 5.7%  |            |
|                                                                                              | An extreme                         | 106     | 24.8% | 65      | 24.1% | 41    | 25.9% |            |
| 4. How much do you need any medical treatment to function in your daily life?                | Not at all                         | 67      | 15.7% | 36      | 13.3% | 31    | 19.6% | 0.007      |
|                                                                                              | A little                           | 69      | 16.1% | 33      | 12.2% | 36    | 22.8% |            |
|                                                                                              | A moderate amount                  | 136     | 31.8% | 91      | 33.7% | 45    | 28.5% |            |
|                                                                                              | Very much                          | 24      | 5.6%  | 17      | 6.3%  | 7     | 4.4%  |            |
|                                                                                              | An extreme                         | 132     | 30.8% | 93      | 34.4% | 39    | 24.7% |            |
| 10. Do you have enough energy for everyday life?                                             | Not at all                         | 36      | 8.4%  | 25      | 9.3%  | 11    | 7.0%  | 0.090      |
|                                                                                              | A little                           | 102     | 23.8% | 61      | 22.6% | 41    | 25.9% |            |
|                                                                                              | Moderately                         | 153     | 35.7% | 103     | 38.1% | 50    | 31.6% |            |
|                                                                                              | Mostly                             | 81      | 18.9% | 54      | 20.0% | 27    | 17.1% |            |
|                                                                                              | Completely                         | 56      | 13.1% | 27      | 10.0% | 29    | 18.4% |            |
| 15. How well are you able to get around?                                                     | Very poor                          | 32      | 7.5%  | 19      | 7.0%  | 13    | 8.2%  | 0.008      |
|                                                                                              | Poor                               | 50      | 11.7% | 24      | 8.9%  | 26    | 16.5% |            |
|                                                                                              | Neither poor nor good              | 90      | 21.0% | 48      | 17.8% | 42    | 26.6% |            |
|                                                                                              | Good                               | 116     | 27.1% | 81      | 30.0% | 35    | 22.2% |            |
|                                                                                              | Very good                          | 140     | 32.7% | 98      | 36.3% | 42    | 26.6% |            |
| 16. How satisfied are you with your sleep?                                                   | Very dissatisfied                  | 60      | 14.0% | 37      | 13.7% | 23    | 14.6% | 0.429      |
|                                                                                              | Dissatisfied                       | 70      | 16.4% | 41      | 15.2% | 29    | 18.4% |            |
|                                                                                              | Neither satisfied nor dissatisfied | 132     | 30.8% | 78      | 28.9% | 54    | 34.2% |            |
|                                                                                              | Satisfied                          | 126     | 29.4% | 86      | 31.9% | 40    | 25.3% |            |
|                                                                                              | Very satisfied                     | 40      | 9.3%  | 28      | 10.4% | 12    | 7.6%  |            |
| 17. How satisfied are you with your ability to perform                                       | Very dissatisfied                  | 43      | 10.0% | 28      | 10.4% | 15    | 9.5%  | 0.971      |
|                                                                                              | Dissatisfied                       | 72      | 16.8% | 44      | 16.3% | 28    | 17.7% |            |
|                                                                                              | Neither satisfied nor dissatisfied | 126     | 29.4% | 78      | 28.9% | 48    | 30.4% |            |

|               |                                                                                              |                                    |     |       |     |       |    |       |       |
|---------------|----------------------------------------------------------------------------------------------|------------------------------------|-----|-------|-----|-------|----|-------|-------|
| Psychological | your daily living activities?                                                                | Satisfied                          | 129 | 30.1% | 84  | 31.1% | 45 | 28.5% | 0.456 |
|               |                                                                                              | Very satisfied                     | 58  | 13.6% | 36  | 13.3% | 22 | 13.9% |       |
|               |                                                                                              | Very dissatisfied                  | 61  | 14.3% | 36  | 13.3% | 25 | 15.8% |       |
|               |                                                                                              | Dissatisfied                       | 65  | 15.2% | 37  | 13.7% | 28 | 17.7% |       |
|               | 18. How satisfied are you with your capacity for work?                                       | Neither satisfied nor dissatisfied | 121 | 28.3% | 83  | 30.7% | 38 | 24.1% |       |
|               |                                                                                              | Satisfied                          | 125 | 29.2% | 81  | 30.0% | 44 | 27.8% |       |
|               |                                                                                              | Very satisfied                     | 56  | 13.1% | 33  | 12.2% | 23 | 14.6% |       |
|               |                                                                                              | Not at all                         | 43  | 10.0% | 27  | 10.0% | 16 | 10.1% |       |
|               | 5. How much do you enjoy life?                                                               | A little                           | 6   | 1.4%  | 3   | 1.1%  | 3  | 1.9%  |       |
|               |                                                                                              | A moderate amount                  | 179 | 41.8% | 113 | 41.9% | 66 | 41.8% |       |
|               |                                                                                              | Very much                          | 92  | 21.5% | 60  | 22.2% | 32 | 20.3% |       |
|               |                                                                                              | An extreme amount                  | 108 | 25.2% | 67  | 24.8% | 41 | 25.9% |       |
|               | 6. To what extent do you feel your life to be meaningful?                                    | Not at all                         | 54  | 12.6% | 31  | 11.5% | 23 | 14.6% |       |
|               |                                                                                              | A little                           | 12  | 2.8%  | 8   | 3.0%  | 4  | 2.5%  |       |
|               |                                                                                              | A moderate amount                  | 108 | 25.2% | 69  | 25.6% | 39 | 24.7% |       |
|               |                                                                                              | Very much                          | 97  | 22.7% | 67  | 24.8% | 30 | 19.0% |       |
|               |                                                                                              | An extreme amount                  | 157 | 36.7% | 95  | 35.2% | 62 | 39.2% |       |
|               |                                                                                              | Not at all                         | 51  | 11.9% | 28  | 10.4% | 23 | 14.6% |       |
|               | 7. How well are you able to concentrate?                                                     | A little                           | 11  | 2.6%  | 7   | 2.6%  | 4  | 2.5%  |       |
|               |                                                                                              | A moderate amount                  | 214 | 50.0% | 137 | 50.7% | 77 | 48.7% |       |
|               |                                                                                              | Very much                          | 93  | 21.7% | 68  | 25.2% | 25 | 15.8% |       |
|               |                                                                                              | extremely                          | 59  | 13.8% | 30  | 11.1% | 29 | 18.4% |       |
|               | 11. Are you able to accept your bodily appearance?                                           | Not at all                         | 38  | 8.9%  | 28  | 10.4% | 10 | 6.3%  |       |
|               |                                                                                              | A little                           | 62  | 14.5% | 37  | 13.7% | 25 | 15.8% |       |
|               |                                                                                              | Moderately                         | 73  | 17.1% | 44  | 16.3% | 29 | 18.4% |       |
|               |                                                                                              | Mostly                             | 93  | 21.7% | 58  | 21.5% | 35 | 22.2% |       |
|               |                                                                                              | Completely                         | 162 | 37.9% | 103 | 38.1% | 59 | 37.3% |       |
|               |                                                                                              | Very dissatisfied                  | 38  | 8.9%  | 31  | 11.5% | 7  | 4.4%  |       |
| Social        | 19. How satisfied are you with yourself?                                                     | Dissatisfied                       | 60  | 14.0% | 35  | 13.0% | 25 | 15.8% | 0.1   |
|               |                                                                                              | Neither satisfied nor dissatisfied | 89  | 20.8% | 51  | 18.9% | 38 | 24.1% |       |
|               |                                                                                              | Satisfied                          | 140 | 32.7% | 91  | 33.7% | 49 | 31.0% |       |
|               |                                                                                              | Very satisfied                     | 101 | 23.6% | 62  | 23.0% | 39 | 24.7% |       |
|               | 26. How often do you have negative feelings such as blue mood, despair, anxiety, depression? | Never                              | 31  | 7.2%  | 18  | 6.7%  | 13 | 8.2%  |       |
|               |                                                                                              | Seldom                             | 94  | 22.0% | 58  | 21.5% | 36 | 22.8% |       |
|               |                                                                                              | Quite often                        | 126 | 29.4% | 76  | 28.1% | 50 | 31.6% |       |
|               |                                                                                              | Very often                         | 124 | 29.0% | 75  | 27.8% | 49 | 31.0% |       |
|               |                                                                                              | Always                             | 53  | 12.4% | 43  | 15.9% | 10 | 6.3%  |       |
|               |                                                                                              | Very dissatisfied                  | 52  | 12.1% | 29  | 10.7% | 23 | 14.6% |       |
|               | 20. How satisfied are you with your personal relationships?                                  | Dissatisfied                       | 59  | 13.8% | 34  | 12.6% | 25 | 15.8% |       |
|               |                                                                                              | Neither satisfied nor dissatisfied | 100 | 23.4% | 62  | 23.0% | 38 | 24.1% |       |
|               |                                                                                              | Satisfied                          | 129 | 30.1% | 92  | 34.1% | 37 | 23.4% |       |
|               |                                                                                              | Very satisfied                     | 88  | 20.6% | 53  | 19.6% | 35 | 22.2% |       |
|               | 21. How satisfied are you with your sex life?                                                | Very dissatisfied                  | 70  | 16.4% | 38  | 14.1% | 32 | 20.3% | 0.002 |
|               |                                                                                              | Dissatisfied                       | 70  | 16.4% | 34  | 12.6% | 36 | 22.8% |       |
|               |                                                                                              | Neither satisfied nor dissatisfied | 126 | 29.4% | 80  | 29.6% | 46 | 29.1% |       |
|               |                                                                                              | Satisfied                          | 108 | 25.2% | 82  | 30.4% | 26 | 16.5% |       |

|                    |                                                                                                |                                       |     |       |    |       |     |       |       |
|--------------------|------------------------------------------------------------------------------------------------|---------------------------------------|-----|-------|----|-------|-----|-------|-------|
| Environmental<br>1 | 22. How satisfied<br>are you with the<br>support you get<br>from your friends?                 | Very satisfied                        | 54  | 12.6% | 36 | 13.3% | 18  | 11.4% | 0.011 |
|                    |                                                                                                | Very dissatisfied                     | 72  | 16.8% | 47 | 17.4% | 25  | 15.8% |       |
|                    |                                                                                                | Dissatisfied                          | 58  | 13.6% | 35 | 13.0% | 23  | 14.6% |       |
|                    |                                                                                                | Neither satisfied nor<br>dissatisfied | 107 | 25.0% | 54 | 20.0% | 53  | 33.5% |       |
|                    |                                                                                                | Satisfied                             | 113 | 26.4% | 83 | 30.7% | 30  | 19.0% |       |
|                    | 8. How safe do you<br>feel in your daily<br>life?                                              | Very satisfied                        | 78  | 18.2% | 51 | 18.9% | 27  | 17.1% | 0.105 |
|                    |                                                                                                | Not at all                            | 59  | 13.8% | 37 | 13.7% | 22  | 13.9% |       |
|                    |                                                                                                | A little                              | 6   | 1.4%  | 5  | 1.9%  | 1   | 0.6%  |       |
|                    |                                                                                                | A moderate amount                     | 133 | 31.1% | 82 | 30.4% | 51  | 32.3% |       |
|                    |                                                                                                | Very much                             | 102 | 23.8% | 74 | 27.4% | 28  | 17.7% |       |
|                    | 9. How healthy is<br>your physical<br>environment?                                             | Extremely                             | 128 | 29.9% | 72 | 26.7% | 56  | 35.4% | 0.767 |
|                    |                                                                                                | Not at all                            | 40  | 9.3%  | 26 | 9.6%  | 14  | 8.9%  |       |
|                    |                                                                                                | A little                              | 6   | 1.4%  | 4  | 1.5%  | 2   | 1.3%  |       |
|                    |                                                                                                | A moderate amount                     | 160 | 37.4% | 96 | 35.6% | 64  | 40.5% |       |
|                    |                                                                                                | Very much                             | 120 | 28.0% | 81 | 30.0% | 39  | 24.7% |       |
|                    | 12. Have you<br>enough money to<br>meet your needs?                                            | Extremely                             | 102 | 23.8% | 63 | 23.3% | 39  | 24.7% | 0.893 |
|                    |                                                                                                | Not at all                            | 75  | 17.5% | 46 | 17.0% | 29  | 18.4% |       |
|                    |                                                                                                | A little                              | 79  | 18.5% | 47 | 17.4% | 32  | 20.3% |       |
|                    |                                                                                                | Moderately                            | 103 | 24.1% | 68 | 25.2% | 35  | 22.2% |       |
|                    |                                                                                                | Mostly                                | 82  | 19.2% | 51 | 18.9% | 31  | 19.6% |       |
|                    | 13. How available to<br>you is the<br>information that<br>you need in your<br>day-to-day life? | Completely                            | 89  | 20.8% | 58 | 21.5% | 31  | 19.6% | 0.038 |
|                    |                                                                                                | Not at all                            | 33  | 7.7%  | 21 | 7.8%  | 12  | 7.6%  |       |
|                    |                                                                                                | A little                              | 83  | 19.4% | 41 | 15.2% | 42  | 26.6% |       |
|                    |                                                                                                | Moderately                            | 112 | 26.2% | 78 | 28.9% | 34  | 21.5% |       |
|                    |                                                                                                | Mostly                                | 107 | 25.0% | 66 | 24.4% | 41  | 25.9% |       |
|                    | 14. To what extent<br>do you have the<br>opportunity for<br>leisure activities?                | Completely                            | 93  | 21.7% | 64 | 23.7% | 290 | 18.4% | 0.450 |
|                    |                                                                                                | Not at all                            | 76  | 17.8% | 46 | 17.0% | 30  | 19.0% |       |
|                    |                                                                                                | A little                              | 133 | 31.1% | 78 | 28.9% | 55  | 34.8% |       |
|                    |                                                                                                | Moderately                            | 100 | 23.4% | 63 | 23.3% | 37  | 23.4% |       |
|                    |                                                                                                | Mostly                                | 77  | 18.0% | 53 | 19.6% | 24  | 15.2% |       |
|                    | 23. How satisfied<br>are you with the<br>conditions of your<br>living place?                   | Completely                            | 42  | 9.8%  | 30 | 11.1% | 12  | 7.6%  | 0.612 |
|                    |                                                                                                | Very dissatisfied                     | 51  | 11.9% | 36 | 13.3% | 15  | 9.5%  |       |
|                    |                                                                                                | Dissatisfied                          | 42  | 9.8%  | 25 | 9.3%  | 17  | 10.8% |       |
|                    |                                                                                                | Neither satisfied nor<br>dissatisfied | 95  | 22.2% | 59 | 21.9% | 36  | 22.8% |       |
|                    |                                                                                                | Satisfied                             | 128 | 29.9% | 84 | 31.1% | 44  | 27.8% |       |
|                    | 24. How satisfied<br>are you with your<br>access to health<br>services?                        | Very satisfied                        | 112 | 26.2% | 66 | 24.4% | 46  | 29.1% | 0.152 |
|                    |                                                                                                | Very dissatisfied                     | 58  | 13.6% | 39 | 14.4% | 19  | 12.0% |       |
|                    |                                                                                                | Dissatisfied                          | 65  | 15.2% | 41 | 15.2% | 24  | 15.2% |       |
|                    |                                                                                                | Neither satisfied nor<br>dissatisfied | 85  | 19.9% | 45 | 16.7% | 40  | 25.3% |       |
|                    |                                                                                                | Satisfied                             | 124 | 29.0% | 77 | 28.5% | 47  | 29.7% |       |
|                    | 25. How satisfied<br>are you with your<br>transport?                                           | Very satisfied                        | 96  | 22.4% | 68 | 25.2% | 28  | 17.7% | 0.432 |
|                    |                                                                                                | Very dissatisfied                     | 41  | 9.6%  | 21 | 7.8%  | 20  | 12.7% |       |
|                    |                                                                                                | Dissatisfied                          | 50  | 11.7% | 33 | 12.2% | 17  | 10.8% |       |
|                    |                                                                                                | Neither satisfied nor<br>dissatisfied | 70  | 16.4% | 46 | 17.0% | 24  | 15.2% |       |
|                    |                                                                                                | Satisfied                             | 137 | 32.0% | 91 | 33.7% | 46  | 29.1% |       |
|                    |                                                                                                | Very satisfied                        | 130 | 30.4% | 79 | 29.3% | 51  | 32.3% |       |
